# Supplementary material
Source: publisher figshare collection journal article supplement (https://gsapubs.figshare.com/ndownloader/files/24450512)
Supplement: Supplementary file 1 [file 24450512]

## Sheet: Sheet1
Table S5-1 - Grain size measurements on the Tumba-Funda boulder.
	See accompanying Supplement S5 text.
FID	Id	px_length	µm_length	mm_length	phi_length
0	0	48.3898	4597.03	4.59703	0.832264
1	0	22.9897	2184.02	2.18402	0.0880208
2	0	19.7365	1874.97	1.87497	-0.0645567
3	0	27.2349	2587.32	2.58732	0.257474
4	0	15.1168	1436.1	1.4361	-0.331218
5	0	14.6592	1392.62	1.39262	-0.361961
6	0	36.9548	3510.71	3.51071	0.56267
7	0	6.50763	618.225	0.618225	-1.17405
8	0	17.2358	1637.4	1.6374	-0.200036
9	0	63.842	6064.99	6.06499	1.10939
10	0	10.3807	986.171	0.986171	-0.707073
11	0	143.18	13602.1	13.6021	1.91708
12	0	383.332	36416.5	36.4165	2.90188
13	0	24.3043	2308.91	2.30891	0.143629
14	0	11.696	1111.12	1.11112	-0.587779
15	0	12.0388	1143.69	1.14369	-0.558889
16	0	43.8297	4163.82	4.16382	0.733287
17	0	185.87	17657.7	17.6577	2.17802
18	0	60.0934	5708.87	5.70887	1.04887
19	0	18.2462	1733.39	1.73339	-0.143069
20	0	114.307	10859.2	10.8592	1.69187
21	0	224.91	21366.5	21.3665	2.36868
22	0	15.0194	1426.84	1.42684	-0.337682
23	0	9.08856	863.413	0.863413	-0.840009
24	0	23.1668	2200.85	2.20085	0.0956966
25	0	18.4575	1753.47	1.75347	-0.131553
26	0	64.4694	6124.59	6.12459	1.11916
27	0	9.73456	924.783	0.924783	-0.771344
28	0	18.2347	1732.3	1.7323	-0.143699
29	0	12.5059	1188.06	1.18806	-0.520822
30	0	88.4683	8404.49	8.40449	1.43562
31	0	11.529	1095.25	1.09525	-0.60216
32	0	51.1858	4862.65	4.86265	0.888437
33	0	7.23964	687.766	0.687766	-1.06745
34	0	20.9024	1985.73	1.98573	-0.00716242
35	0	62.9291	5978.26	5.97826	1.09498
36	0	10.2384	972.648	0.972648	-0.720881
37	0	31.1658	2960.75	2.96075	0.392295
38	0	21.7189	2063.3	2.0633	0.0311581
39	0	10.6892	1015.47	1.01547	-0.677792
40	0	16.6669	1583.36	1.58336	-0.233601
41	0	58.3103	5539.48	5.53948	1.01875
42	0	64.7663	6152.79	6.15279	1.12376
43	0	18.6833	1774.92	1.77492	-0.119394
44	0	12.0882	1148.38	1.14838	-0.554792
45	0	11.6736	1108.99	1.10899	-0.589698
46	0	11.7719	1118.33	1.11833	-0.581308
47	0	59.7926	5680.3	5.6803	1.04386
48	0	21.6948	2061	2.061	0.0300458
49	0	5.51355	523.787	0.523787	-1.33982
50	0	15.2205	1445.94	1.44594	-0.324384
51	0	16.7638	1592.56	1.59256	-0.227806
52	0	8.14509	773.783	0.773783	-0.949611
53	0	4.76816	452.975	0.452975	-1.48507
54	0	9.47751	900.363	0.900363	-0.798104
55	0	7.00414	665.393	0.665393	-1.10052
56	0	49.3146	4684.89	4.68489	0.851196
57	0	14.3118	1359.62	1.35962	-0.385941
58	0	59.9939	5699.42	5.69942	1.04722
59	0	96.8814	9203.73	9.20373	1.52646
60	0	23.058	2190.51	2.19051	0.090987
61	0	18.3664	1744.81	1.74481	-0.136501
62	0	17.1443	1628.71	1.62871	-0.205357
63	0	16.0518	1524.92	1.52492	-0.271207
64	0	19.5604	1858.24	1.85824	-0.073517
65	0	14.652	1391.94	1.39194	-0.362449
66	0	12.3711	1175.25	1.17525	-0.531662
67	0	7.10813	675.272	0.675272	-1.08579
68	0	12.631	1199.95	1.19995	-0.510868
69	0	7.82417	743.296	0.743296	-0.989808
70	0	36.9065	3506.12	3.50612	0.561363
71	0	27.3271	2596.08	2.59608	0.260854
72	0	12.6642	1203.1	1.2031	-0.508247
73	0	58.3517	5543.41	5.54341	1.01946
74	0	126.242	11993	11.993	1.79118
75	0	10.7771	1023.82	1.02382	-0.669602
76	0	11.6736	1108.99	1.10899	-0.589698
77	0	14.4793	1375.53	1.37553	-0.374307
78	0	27.5715	2619.3	2.6193	0.269758
79	0	90.3361	8581.93	8.58193	1.45651
80	0	16.5976	1576.77	1.57677	-0.237769
81	0	7.50971	713.422	0.713422	-1.03083
82	0	19.3665	1839.82	1.83982	-0.0834786
83	0	21.7093	2062.38	2.06238	0.0307135
84	0	43.05	4089.75	4.08975	0.715336
85	0	8.25446	784.174	0.784174	-0.936272
86	0	80.461	7643.8	7.6438	1.34075
87	0	11.7273	1114.1	1.1141	-0.585104
88	0	69.2966	6583.18	6.58318	1.19137
89	0	11.8164	1122.56	1.12256	-0.57754
90	0	24.9867	2373.74	2.37374	0.171319
91	0	62.2323	5912.07	5.91207	1.08385
92	0	33.475	3180.13	3.18013	0.463774
93	0	42.9232	4077.7	4.0777	0.712387
94	0	41.4143	3934.36	3.93436	0.6766
95	0	19.9898	1899.03	1.89903	-0.0518036
96	0	12.0882	1148.38	1.14838	-0.554792
97	0	11.0271	1047.57	1.04757	-0.646671
98	0	7.326	695.97	0.69597	-1.0556
99	0	25.3987	2412.87	2.41287	0.187671
100	0	16.0779	1527.4	1.5274	-0.269582
101	0	13.0233	1237.21	1.23721	-0.480285
102	0	12.902	1225.69	1.22569	-0.489643
103	0	19.7524	1876.48	1.87648	-0.06375
104	0	9.1575	869.962	0.869962	-0.832452
105	0	11.3734	1080.47	1.08047	-0.61575
106	0	8.84304	840.088	0.840088	-0.867395
107	0	7.83756	744.568	0.744568	-0.988098
108	0	10.4512	992.863	0.992863	-0.70031
109	0	10.3807	986.171	0.986171	-0.707073
110	0	8.41871	799.777	0.799777	-0.916569
111	0	37.8931	3599.85	3.59985	0.587744
112	0	16.5913	1576.17	1.57617	-0.23815
113	0	21.978	2087.91	2.08791	0.0430164
114	0	19.0445	1809.23	1.80923	-0.100246
115	0	9.27126	880.77	0.88077	-0.820106
116	0	20.9024	1985.73	1.98573	-0.00716242
117	0	11.2249	1066.37	1.06637	-0.628887
118	0	15.1168	1436.1	1.4361	-0.331218
119	0	10.3807	986.171	0.986171	-0.707073
120	0	15.5947	1481.49	1.48149	-0.300097
121	0	17.2419	1637.98	1.63798	-0.199683
122	0	13.0314	1237.98	1.23798	-0.479668
123	0	71.9782	6837.93	6.83793	1.22934
124	0	53.2328	5057.12	5.05712	0.927649
125	0	21.6561	2057.33	2.05733	0.0282609
126	0	5.95237	565.476	0.565476	-1.26324
127	0	15.7352	1494.84	1.49484	-0.291126
128	0	77.7148	7382.9	7.3829	1.30602
129	0	9.65888	917.594	0.917594	-0.779147
130	0	18.4802	1755.62	1.75562	-0.130324
131	0	65.1487	6189.13	6.18913	1.12965
132	0	15.4083	1463.79	1.46379	-0.312118
133	0	17.8304	1693.88	1.69388	-0.166123
134	0	26.9244	2557.81	2.55781	0.246006
135	0	12.9086	1226.32	1.22632	-0.489132
136	0	14.4272	1370.58	1.37058	-0.377914
137	0	60.8304	5778.89	5.77889	1.06106
138	0	71.4476	6787.52	6.78752	1.22194
139	0	202.91	19276.5	19.2765	2.26574
140	0	157.02	14916.9	14.9169	2.00935
141	0	42.492	4036.74	4.03674	0.702291
142	0	64.3678	6114.94	6.11494	1.11759
143	0	19.2111	1825.05	1.82505	-0.0915379
144	0	122.601	11647.1	11.6471	1.76191
145	0	41.8499	3975.74	3.97574	0.687063
146	0	21.8872	2079.28	2.07928	0.038876
147	0	12.3711	1175.25	1.17525	-0.531662
148	0	20.6108	1958.03	1.95803	-0.0212097
149	0	8.74549	830.821	0.830821	-0.878488
150	0	35.3	3353.5	3.3535	0.516858
151	0	17.8625	1696.94	1.69694	-0.164323
152	0	111.578	10599.9	10.5999	1.6677
153	0	20.8873	1984.3	1.9843	-0.00788271
154	0	34.0956	3239.08	3.23908	0.482141
155	0	67.1892	6382.97	6.38297	1.16049
156	0	78.8396	7489.77	7.48977	1.32039
157	0	79.6887	7570.42	7.57042	1.3311
158	0	19.4314	1845.98	1.84598	-0.080136
159	0	10.5723	1004.37	1.00437	-0.688788
160	0	8.80973	836.924	0.836924	-0.871169
